# Supplementary material
Source: publisher site journal article supplement (https://www.dovepress.com/article/548650)
Supplement: Supplementary file 1 [file supplementary%20material_1.docx]

**Supplementary Figure 1. Univariable analysis of risk factors of CVD.**

**
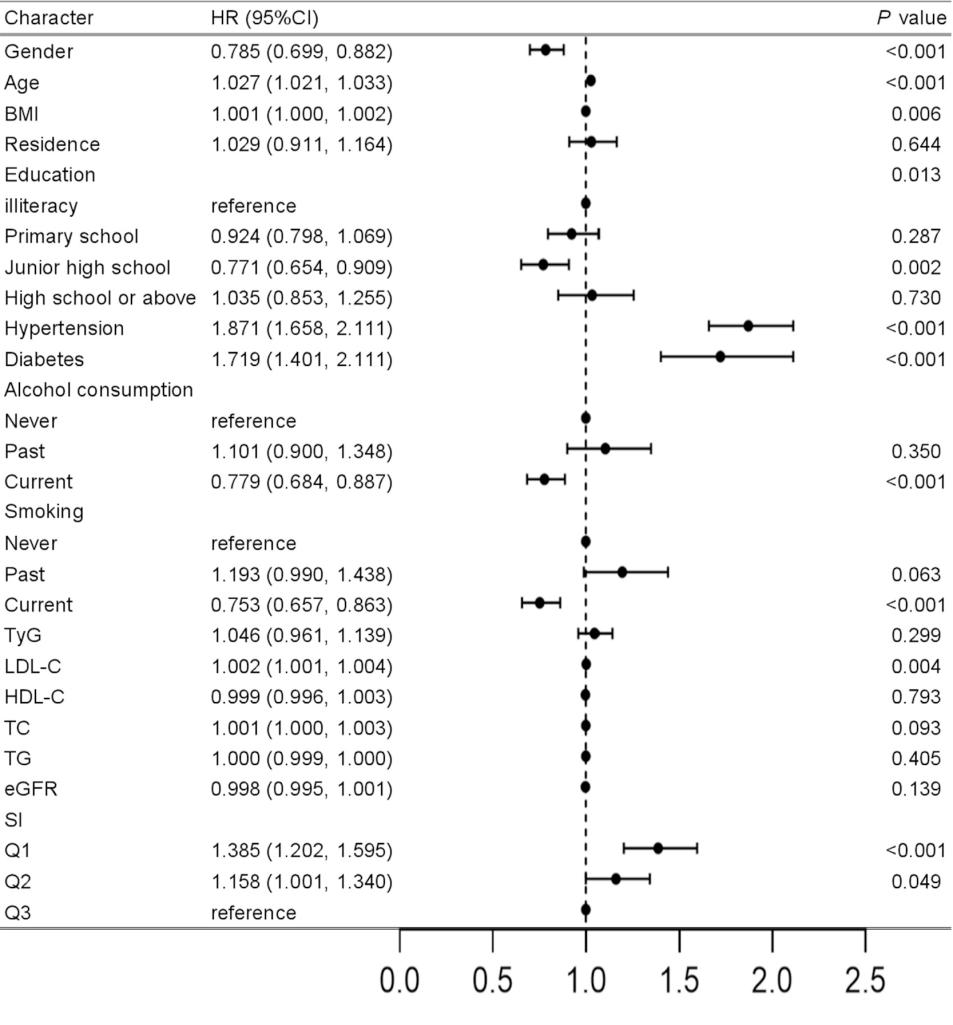
**

Abbreviations are the same as those shown in Table 1.SI levels, age, gender, hypertension, diabetes, smoking status, alcohol consumption, BMI, LDL-C, and education are associated with the risk of CVD.

**Supplementary Figure 2. Subgroup analysis for the effect of SI on the risk of CVD.**

**
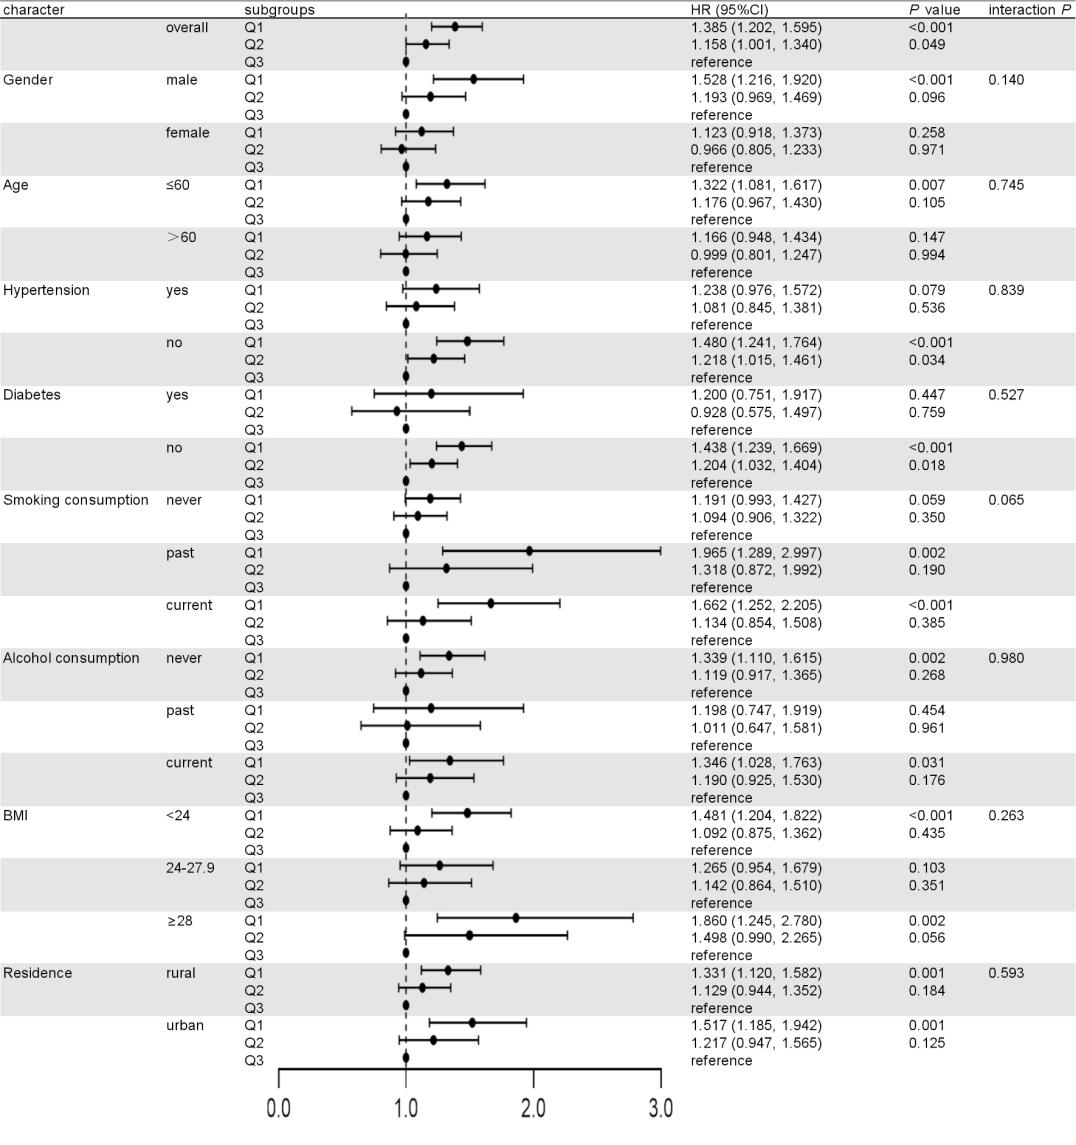
**

Crude model.

**Supplementary Figure 3. The effect of SI on the risk of CVD in subgroups according to eGFR.**

**
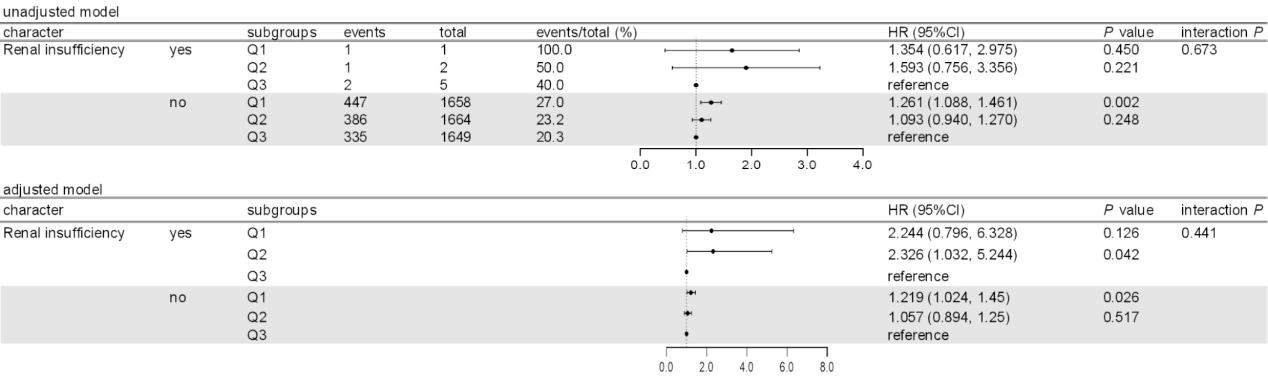
**

Adjusted model included age, gender, hypertension, diabetes, smoking status, alcohol consumption history, BMI, LDL-C and education.
